# Supplementary material
Source: MDPI journal article supplement (https://www.mdpi.com/1424-8247/14/8/745)

**Figure S1.A.**  $^1\text{H}$  NMR of compound **7b**

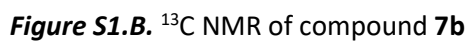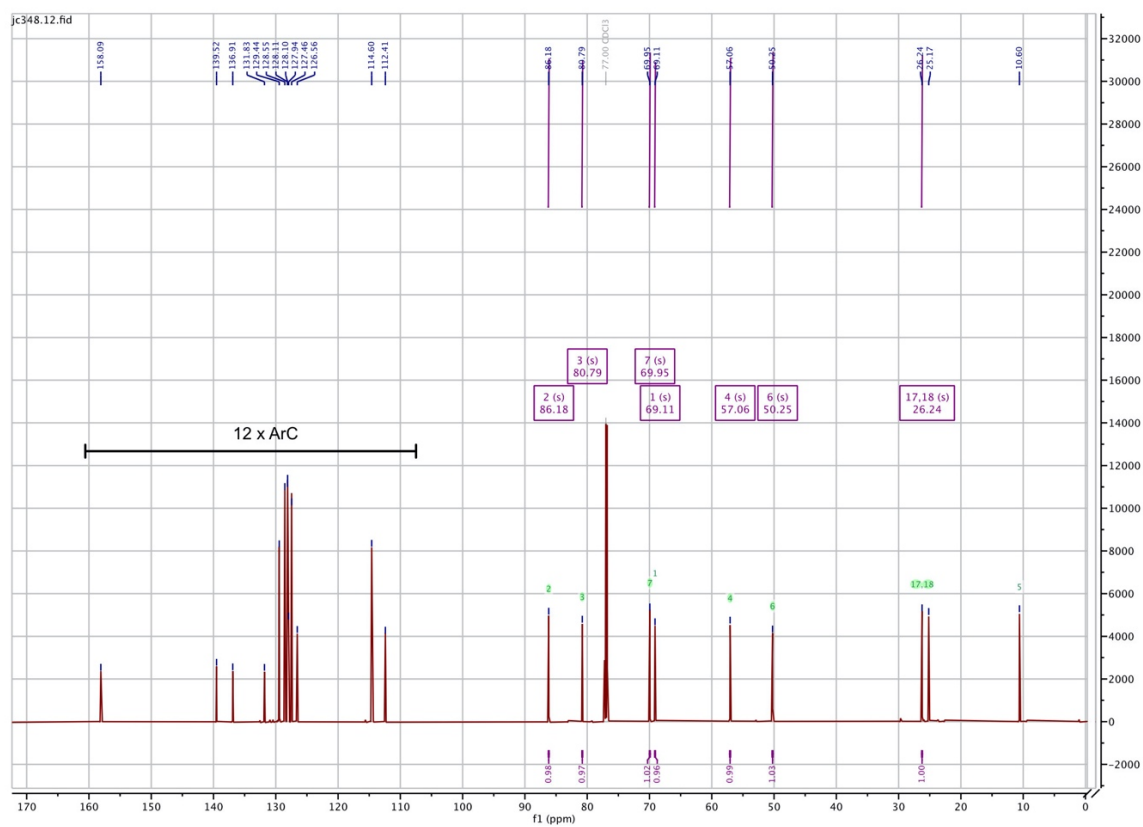

**Figure S2.A.**  $^1\text{H}$  NMR of compound **8b**

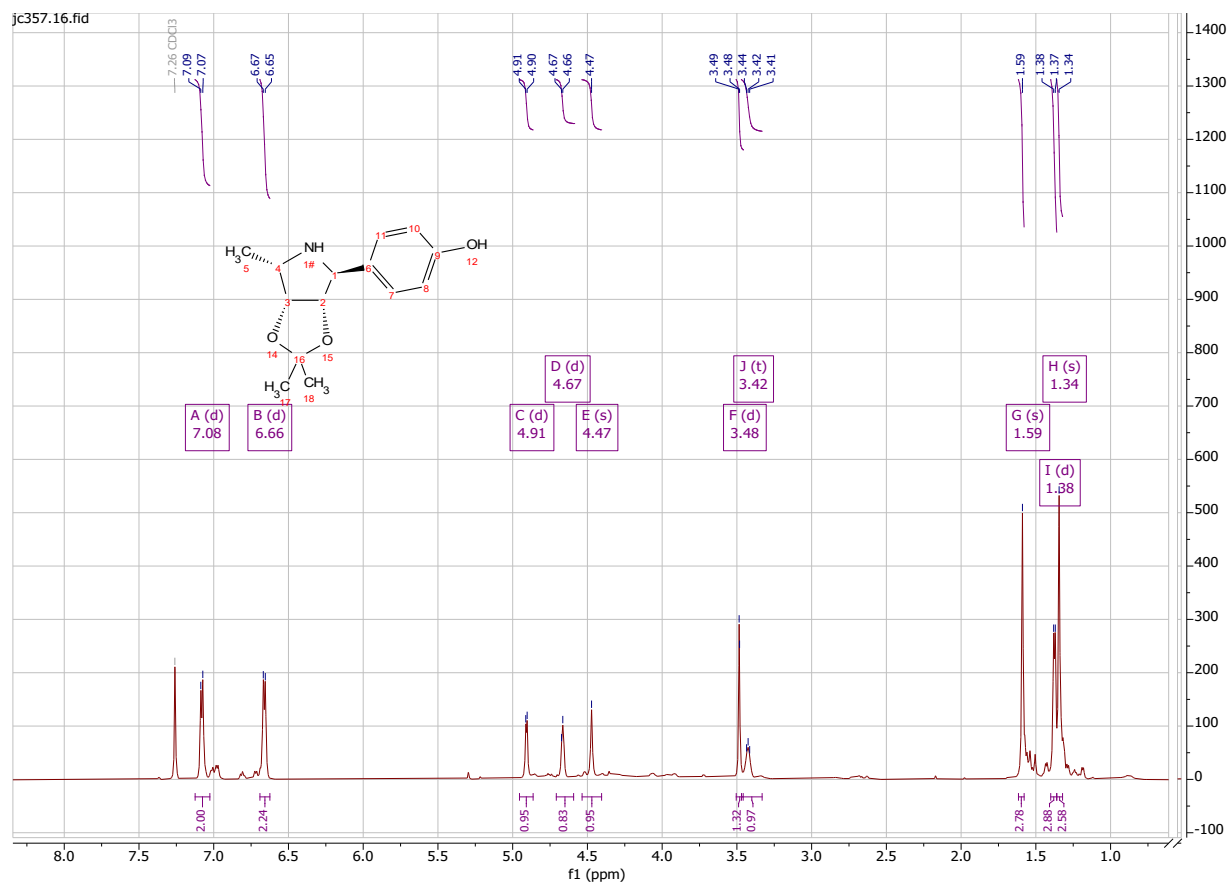

**Figure S2.B.**  $^{13}\text{C}$  NMR of compound **8b**

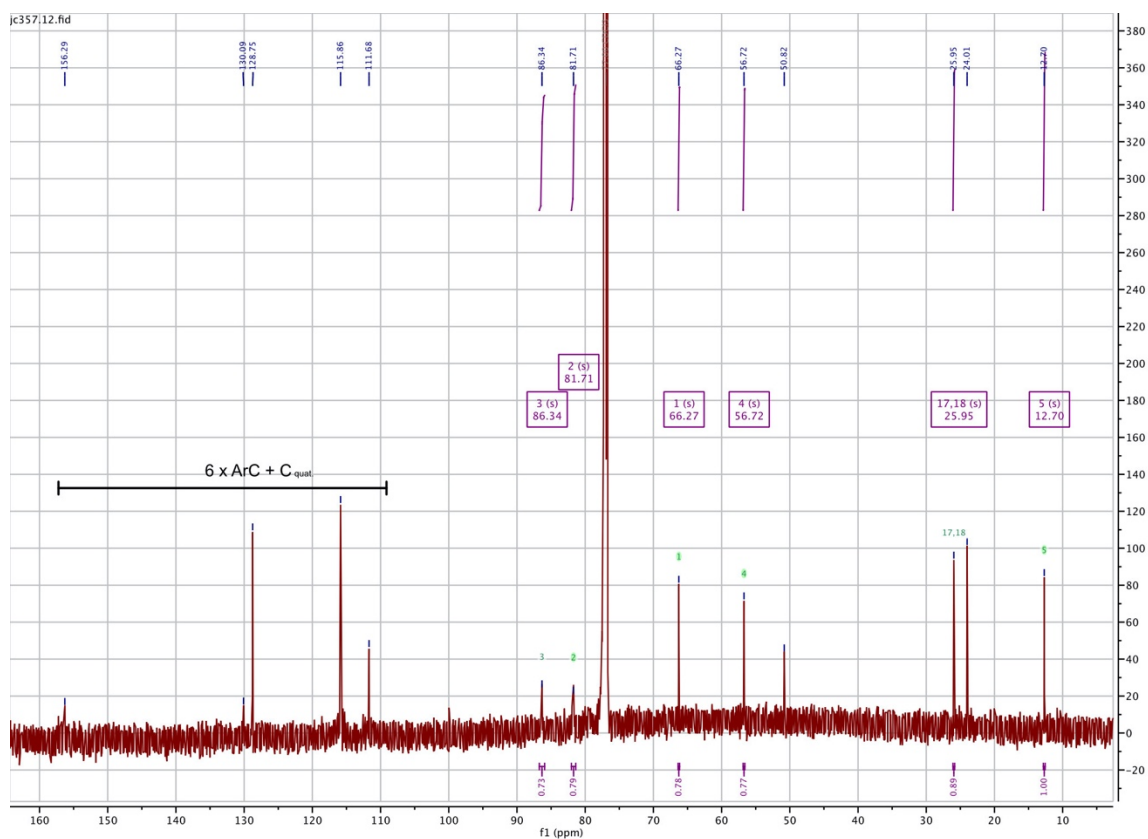

**Figure S3.A.**  $^1\text{H}$  NMR of compound **10**

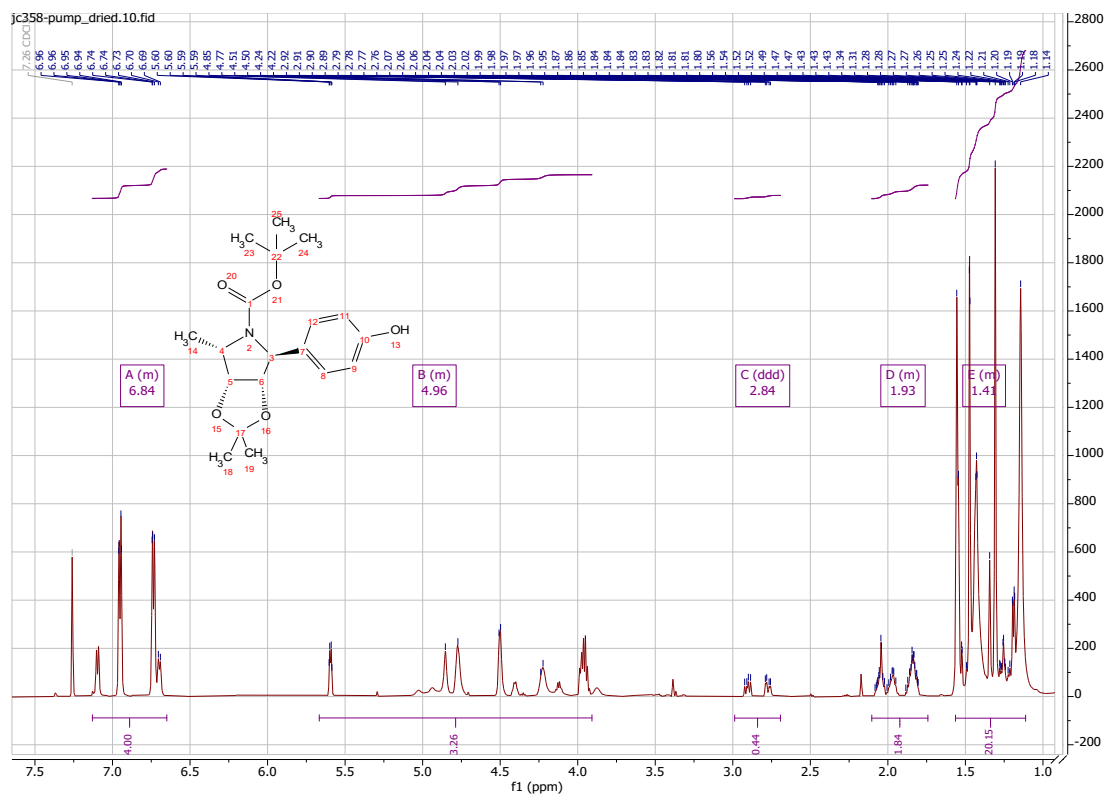

**Figure S3.B.**  $^{13}\text{C}$  NMR of compound **10**

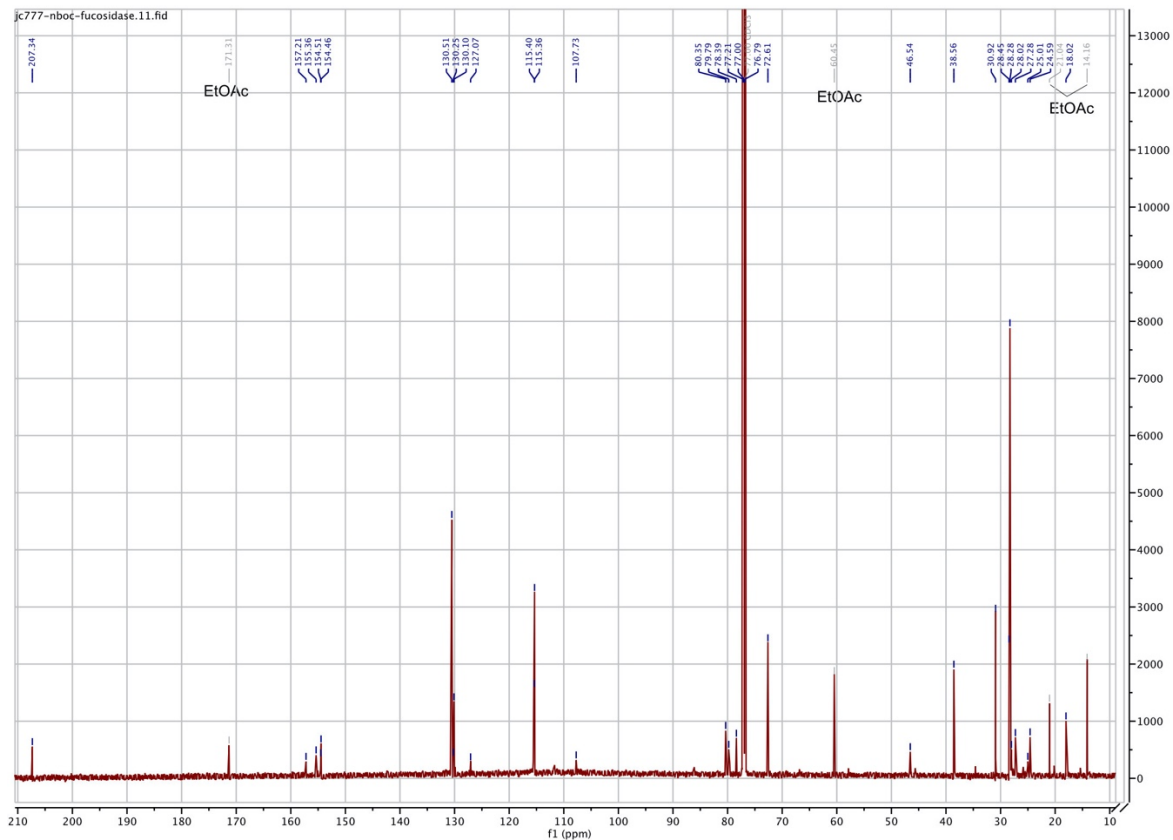

**Figure S4.** HRMS of compound **10**

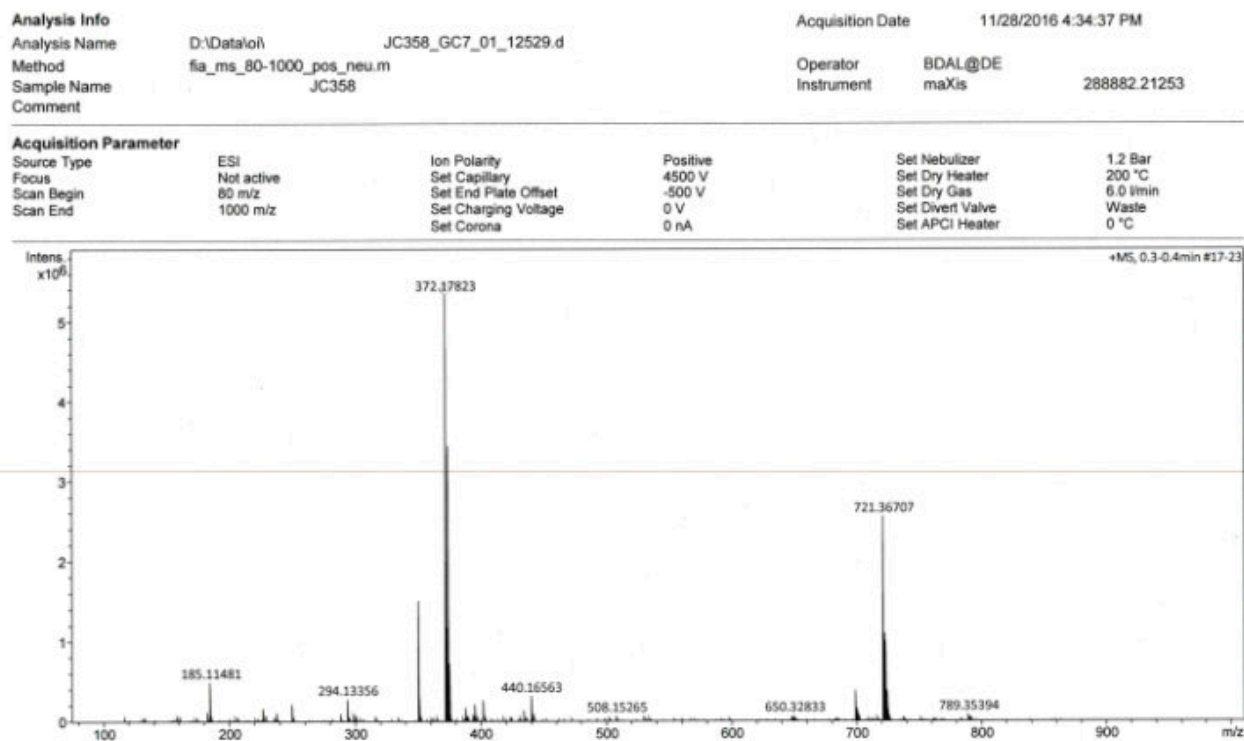

**Figure S5.** Semipreparative HPLC chromatogram of [<sup>11</sup>C]**3** from GE FX Module

Product: 18F-FDG, Process: JC\_Pyrrolidine, Batch No.: 20021201, Operator: Admin, Start of Synthesis: 2/12/2020 07:38:35, Page 1/1

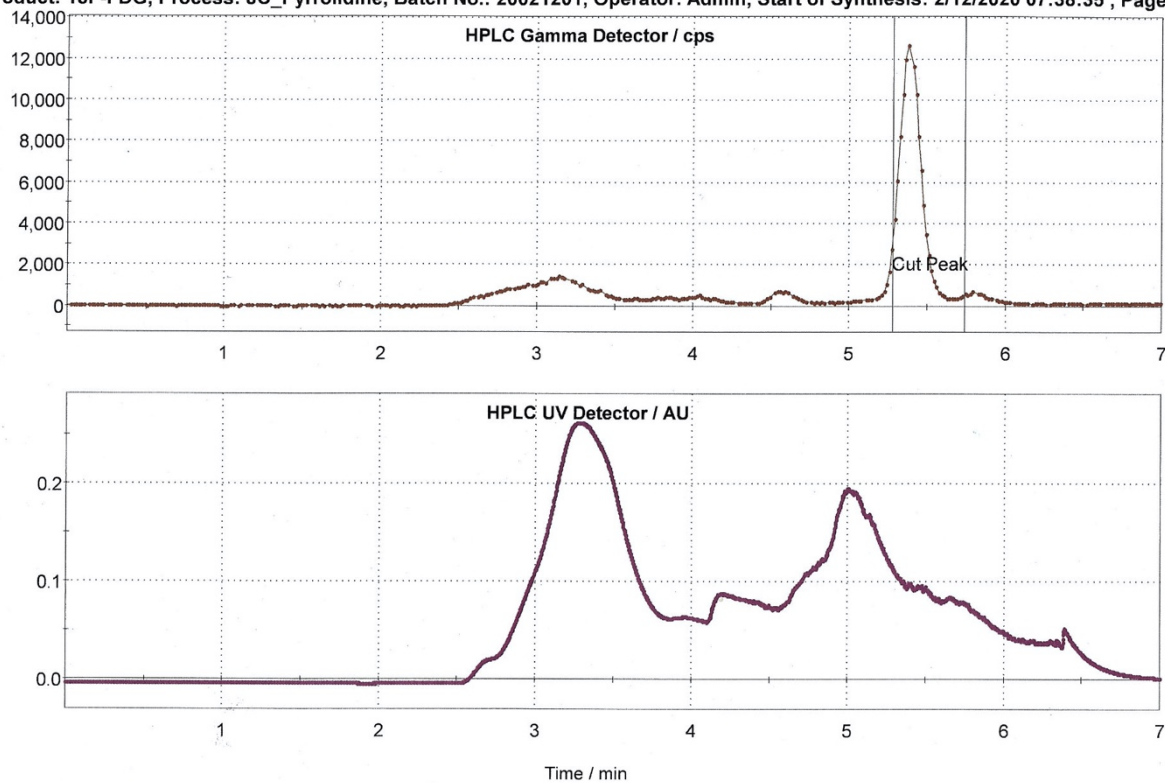

Supplement: s1 [file s1]
